# Supplementary material for: Functional Diversity of Carbohydrate-Active Enzymes Enabling a Bacterium to Ferment Plant Biomass
Source: PLoS Genet. 2014 Nov 13;10(11):e1004773. doi: 10.1371/journal.pgen.1004773 (PMC4230839; doi:10.1371/journal.pgen.1004773)
Supplement: Table S2 — C. phytofermentans CAZymes in the CAZy database [15] including gene name, NCBI accession, gene (bp) and protein (amino acid) length, predicted protein molecular weight (kDa), N-terminal secretion signal cleavage position (SignalP [52] Y-max position), CAZy classification, and annotation. The 56 CAZymes purified in this study are shown in blue. (XLS) [file pgen.1004773.s014.xls]

## Sheet: All
Gene	Accession	Gene_length_bp	Protein_length_aa	Mol_weight_kDa	Signal_cleavage_position_aa	CAZy	Annotation
Cphy0110	ABX40499.1	1035	344	37778.2	None	CE4	acetyl xylan esterase, chitin deacetylase
Cphy0191	ABX40578.1	1539	512	58507.2	None	GH43	Beta-xylosidase, alpha-L-arabinofuranosidase, arabinanase
Cphy0203	ABX40590.1	1128	375	44333	None	GH105	rhamnogalacturonyl hydrolase
Cphy0218	ABX40605.1	2343	780	88273	None	GH31	Alpha-xylosidase, alpha-glucosidase
Cphy0220	ABX40607.1	2166	721	81176.4	None	GH3	Beta-glucosidase, beta-xylosidase, alpha-arabinofuranosidase
Cphy0288	ABX40675.1	1155	384	43924.7	None	GH88	beta-glucuronyl hydrolase
Cphy0297	ABX40684.1	2913	970	114643	None	GT2	chitin oligosaccharide synthase
Cphy0299	ABX40686.1	1029	342	38918.9	None	GT2	Cellulose, chitin oligosaccharide synthase
Cphy0323	ABX40710.1	1026	341	40119.8	None	GT2	Cellulose, chitin oligosaccharide synthase
Cphy0343	ABX40730.1	2412	803	91051	None	PL11	rhamnogalacturonan lyase, FG-GAP repeat
Cphy0405	ABX40792.1	705	234	27592.7	None	CE4	acetyl xylan esterase, chitin deacetylase
Cphy0430	ABX40817.1	2496	831	94482.1	None	GH94	cellobiose phosphorylase
Cphy0488	ABX40875.1	2286	761	88748.3	None	PL15	alginate lyase
Cphy0489	ABX40876.1	1869	622	72048.5	None	PL17	alginate lyase
Cphy0492	ABX40879.1	4671	1556	171217	32	CBM50,CBM50,PL7	alginate lyase
Cphy0497	ABX40884.1	2724	907	101189	None	GT51	glycosyl transferase family protein
Cphy0498	ABX40885.1	2733	910	101238	None	GT51	glycosyl transferase family protein
Cphy0530	ABX40917.1	1776	591	69166.4	None	GH2	Beta-galactosidase, beta-mannosidase
Cphy0531	ABX40918.1	1416	471	52751.7	None	GH43	Beta-xylosidase, alpha-L-arabinofuranosidase, arabinanase
Cphy0538	ABX40925.1	972	323	37054.5	None	CE4	acetyl xylan esterase, chitin deacetylase
Cphy0577	ABX40964.1	2172	723	83906.1	None	GH112	1,3-galactosyl-N-acetylhexosamine phosphorylase
Cphy0591	ABX40978.1	1941	646	74349.2	None	GH127	beta-L-arabinofuranosidase
Cphy0601	ABX40988.1	780	259	29316.6	None	CE4	acetyl xylan esterase, chitin deacetylase
Cphy0607	ABX40994.1	1821	606	70078.9	None	GH20	beta-1,6-N-acetylglucosaminidase
Cphy0624	ABX41011.1	2271	756	83730.6	30	CBM22,GH10,CBM3	endo-1,4-beta-xylanase
Cphy0662	ABX41049.1	2244	747	82793.7	None	GH3	Beta-glucosidase, beta-xylosidase, alpha-arabinofuranosidase
Cphy0666	ABX41053.1	2694	897	102695	None	GHnc	hypothetical protein
Cphy0694	ABX41081.1	3342	1113	126352	None	GH94	cellobiose phosphorylase
Cphy0699	ABX41086.1	2232	743	82937.9	None	GH3	Beta-glucosidase, beta-xylosidase, alpha-arabinofuranosidase
Cphy0711	ABX41098.1	1881	626	72885.2	None	GH2	Beta-galactosidase, beta-mannosidase
Cphy0769	ABX41156.1	1323	440	49055.1	None	GH4	Alpha-glucosidase, alpha-galactosidase
Cphy0776	ABX41163.1	1095	364	41655.2	None	GH88	beta-glucuronyl hydrolase
Cphy0777	ABX41164.1	948	315	36531	None	GHnc	hypothetical protein
Cphy0857	ABX41243.1	2703	900	103038	None	GH94	cellobiose phosphorylase
Cphy0858	ABX41244.1	1338	445	51308.2	None	GH30	Beta-glucosidase, beta-xylosidase, beta-fucosidase
Cphy0874	ABX41260.1	2283	760	86794	None	GH95	alpha-1,2-L-fucosidase
Cphy0875	ABX41261.1	1911	636	72678	None	GH43	Beta-xylosidase, alpha-L-arabinofuranosidase, arabinanase
Cphy0886	ABX41272.1	969	322	38386.7	None	GH113	beta-mannanase
Cphy0934	ABX41318.1	1176	391	44812.7	None	GH88	beta-glucuronyl hydrolase
Cphy1019	ABX41399.1	2271	756	88004.7	None	GH65	Phosphorylase: kojibiose , rhamnose, nigerose, maltose
Cphy1071	ABX41451.1	2187	728	80272.5	45	CBM35,GH26,CBM3	endo-1,4-beta-mannosidase
Cphy1125	ABX41503.1	1554	517	57157.8	None	GH3	Beta-glucosidase, beta-xylosidase, alpha-arabinofuranosidase
Cphy1140	ABX41518.1	1158	385	44251.4	None	CE2	acetyl xylan esterase
Cphy1163	ABX41541.1	1407	468	53330.6	32	GH5	cellulase
Cphy1169	ABX41547.1	1500	499	56545.4	None	GH51	Alpha-N-arabinofuranosidase
Cphy1202	ABX41580.1	519	172	20538.9	None	GT1	oligosaccharide biosynthesis protein Alg14-like protein
Cphy1203	ABX41581.1	510	169	19501.7	None	GT1	glycosyltransferase family 28 protein
Cphy1204	ABX41582.1	1230	409	47184.2	None	GT4	sucrose synthase
Cphy1206	ABX41584.1	1074	357	41001.3	None	GT4	sucrose synthase
Cphy1254	ABX41632.1	1074	357	40521	None	CE2	acetyl xylan esterase
Cphy1301	ABX41678.1	1038	345	38926.8	None	CE8	pectinesterase
Cphy1308	ABX41685.1	3258	1085	116744	29	GH87	alpha-1,3-glucanase
Cphy1395	ABX41770.1	2277	758	86778.1	None	GH95	alpha-1,2-L-fucosidase
Cphy1435	ABX41810.1	1092	363	38795.4	None	GH19	chitinase, lysozyme, peptidoglycan binding domain
Cphy1510	ABX41884.1	1563	520	56975.2	34	GH10	endo-1,4-beta-xylanase
Cphy1596	ABX41970.1	2559	852	93573.6	None	GH3	Beta-glucosidase, beta-xylosidase, alpha-arabinofuranosidase
Cphy1612	ABX41986.1	4230	1409	153290	35	PL1,PL9	Pectate lyase, Pectin lyase
Cphy1614	ABX41988.1	627	208	24017.6	None	GT51	glycosyl transferase family protein
Cphy1640	ABX42012.1	726	241	26288.2	28	GH12	xyloglucan endoglucanase
Cphy1645	ABX42017.1	1251	416	48829.6	None	GT2	Cellulose, chitin oligosaccharide synthase
Cphy1652	ABX42024.1	1272	423	48093.7	None	CBM50,CBM50,GH18	Chitinase, lysozyme, peptidoglycan-binding LysM
Cphy1687	ABX42059.1	1011	336	36252.1	27	CBM36,CE4	acetyl xylan esterase, chitin deacetylase
Cphy1695	ABX42067.1	1083	360	42638.9	None	GT2	Cellulose, chitin oligosaccharide synthase
Cphy1711	ABX42083.1	1863	620	70624.7	None	GH28	polygalacturonase, rhamnogalacturonase
Cphy1713	ABX42085.1	1365	454	49120.8	36	CBM32	coagulation factor 5/8 type domain-containing protein
Cphy1714	ABX42086.1	2856	951	105915	26	GH85,CBM32	Endo-b-N-acetylglucosaminidase
Cphy1718	ABX42090.1	957	318	36788.7	None	GH130	beta-1,4-mannooligosaccharide phosphorylase
Cphy1719	ABX42091.1	1284	427	48915.1	None	GH125	Exo-alpha-1,6-mannosidase
Cphy1720	ABX42092.1	3132	1043	122067	None	GH38	alpha-mannosidase
Cphy1750	ABX42122.1	960	319	36185.8	None	GH105	rhamnogalacturonyl hydrolase
Cphy1775	ABX42145.1	6354	2117	225983	32	CBM54,GH55,CBM32,CBM32	beta-1,3-glucanase, S-layer domain
Cphy1799	ABX42168.1	1656	551	57741.7	32	CBM12,GH18	Exo-chitinase
Cphy1800	ABX42169.1	1959	652	70944.9	31	GH18,CBM12	Endo-chitinase
Cphy1847	ABX42216.1	861	286	32800.2	None	CE4	acetyl xylan esterase, chitin deacetylase
Cphy1873	ABX42242.1	3276	1091	118229	30	CBM35,CBM6,GH87	alpha-1,3-glucanase
Cphy1874	ABX42243.1	2262	753	87183.9	None	GH65	Phosphorylase: kojibiose , rhamnose, nigerose, maltose
Cphy1877	ABX42246.1	2394	797	92799.2	None	GH31	Alpha-xylosidase, alpha-glucosidase
Cphy1882	ABX42251.1	4233	1410	159485	29	GH87	alpha-1,3-glucanase
Cphy1888	ABX42257.1	1851	616	65449	35	PL9	pectate lyase
Cphy1892	ABX42261.1	1176	391	44605.9	None	GT28	monogalactosyldiacylglycerol synthase
Cphy1919	ABX42288.1	1038	345	40014.5	None	GH105	rhamnogalacturonyl hydrolase
Cphy1920	ABX42289.1	2169	722	83256.5	None	GH112	1,3-galactosyl-N-acetylhexosamine phosphorylase
Cphy1929	ABX42297.1	2394	797	89977.5	None	GH94	cellobiose phosphorylase
Cphy1934	ABX42302.1	1932	643	74536.3	None	GH13	alpha amylase
Cphy1936	ABX42304.1	2457	818	94345.1	None	GH36	alpha-galactosidase
Cphy1937	ABX42305.1	1284	427	49559.7	None	GH1	Beta-glucosidase, beta-galactosidase
Cphy1943	ABX42311.1	1395	464	52142	27	CBM5,GH19	chitinase
Cphy2025	ABX42393.1	1923	640	74380.4	None	GH2	Beta-galactosidase, beta-mannosidase
Cphy2028	ABX42396.1	1497	498	56456.2	None	GH43	Beta-xylosidase, alpha-L-arabinofuranosidase, arabinanase
Cphy2058	ABX42426.1	1410	469	53051.6	36	GH5	cellulase
Cphy2105	ABX42471.1	639	212	22916.2	30	GH11	endo-1,4-beta-xylanase
Cphy2108	ABX42474.1	2421	806	89454.2	31	CBM22,GH10	endo-1,4-beta-xylanase
Cphy2128	ABX42494.1	2574	857	95393	29	CBM35,GH26,CBM3	endo-1,4-beta-mannosidase
Cphy2190	ABX42556.1	1308	435	50410	None	GH29	Alpha-L-fucosidase
Cphy2210	ABX42576.1	1074	357	41233.6	24	GH18	Chitinase, lysozyme
Cphy2212	ABX42578.1	1947	648	75148.8	None	GT2	Cellulose, chitin oligosaccharide synthase
Cphy2264	ABX42627.1	1023	340	38331.4	None	GH130	beta-1,4-mannooligosaccharide phosphorylase
Cphy2276	ABX42637.1	1599	532	60015.8	29	CBM35,GH26	endo-1,4-beta-mannosidase
Cphy2304	ABX42665.1	3132	1043	117121	28	CBM41,CBM48,GH13	Alpha-amylase
Cphy2331	ABX42692.1	1944	647	72990.4	None	CBM48,GH13	Alpha-amylase
Cphy2332	ABX42693.1	1230	409	45390.2	29	GH3	Beta-glucosidase, beta-xylosidase, alpha-arabinofuranosidase
Cphy2336	ABX42697.1	2421	806	94445	None	GT4	sucrose synthase
Cphy2341	ABX42702.1	1665	554	64671.8	None	GH13	alpha amylase
Cphy2342	ABX42703.1	1617	538	62962.3	None	GH13	alpha amylase
Cphy2344	ABX42705.1	1728	575	65389.3	25	GH13	alpha amylase
Cphy2348	ABX42709.1	2250	749	86851	None	GT35	glycogen/starch/alpha-glucan phosphorylase
Cphy2349	ABX42710.1	1452	483	56827.8	None	GH77	amylomaltase or 4-a-glucanotransferase
Cphy2350	ABX42711.1	1752	583	69012.6	None	GH13	alpha amylase
Cphy2496	ABX42857.1	1437	478	55868.7	None	GT5	glycogen/starch synthase, ADP-glucose type
Cphy2567	ABX42928.1	1425	474	52839.5	None	GH28	polygalacturonase, rhamnogalacturonase
Cphy2572	ABX42933.1	1068	355	40303.8	None	GH18	Chitinase, lysozyme
Cphy2632	ABX42993.1	1632	543	61453	None	GH43	Beta-xylosidase, alpha-L-arabinofuranosidase, arabinanase
Cphy2730	ABX43091.1	825	274	32093.1	None	CE4	acetyl xylan esterase, chitin deacetylase
Cphy2735	ABX43096.1	720	239	27322.7	None	CE12	acetyl xylan esterase
Cphy2736	ABX43097.1	1557	518	58234.2	None	GH28	polygalacturonase, rhamnogalacturonase
Cphy2737	ABX43098.1	885	294	34422.6	None	GH105	rhamnogalacturonyl hydrolase
Cphy2807	ABX43167.1	1260	419	48163.8	None	GT2	Cellulose, chitin oligosaccharide synthase
Cphy2810	ABX43170.1	1071	356	41769.8	None	GT2	Cellulose, chitin oligosaccharide synthase
Cphy2811	ABX43171.1	2565	854	96657.9	None	GT4,GT4	sucrose synthase
Cphy2813	ABX43173.1	975	324	36519.4	None	GT4	sucrose synthase
Cphy2814	ABX43174.1	1374	457	52270	None	GT2	Cellulose, chitin oligosaccharide synthase
Cphy2848	ABX43208.1	1464	487	55075	None	GH4	Alpha-glucosidase, alpha-galactosidase
Cphy2887	ABX43245.1	744	247	28530.1	None	GT2	Cellulose, chitin oligosaccharide synthase
Cphy2919	ABX43277.1	1017	338	36080.3	30	PL9	pectate lyase
Cphy3009	ABX43366.1	2154	717	79867.2	None	GH3	Beta-glucosidase, beta-xylosidase, alpha-arabinofuranosidase
Cphy3010	ABX43367.1	966	321	38057.9	None	GH10	endo-1,4-beta-xylanase
Cphy3011	ABX43368.1	1617	538	61056.7	None	GH43	Beta-xylosidase, alpha-L-arabinofuranosidase, arabinanase
Cphy3022	ABX43379.1	1974	657	75761.7	None	PL12	heparinase II/III family protein
Cphy3023	ABX43380.1	1308	435	49919.4	None	GH29	Alpha-L-fucosidase
Cphy3028	ABX43385.1	1413	470	53713.3	None	GH29	Alpha-L-fucosidase
Cphy3029	ABX43386.1	1176	391	44965.2	None	GH88	beta-glucuronyl hydrolase
Cphy3030	ABX43387.1	2175	724	83867.2	None	GH112	1,3-galactosyl-N-acetylhexosamine phosphorylase
Cphy3056	ABX43413.1	2190	729	83563.2	None	GH36	alpha-galactosidase
Cphy3069	ABX43426.1	1398	465	53259.9	None	CE4	acetyl xylan esterase, chitin deacetylase
Cphy3081	ABX43438.1	3450	1149	132714	None	GH2	Beta-galactosidase, beta-mannosidase
Cphy3102	ABX43458.1	939	312	36918.2	None	GT2	Cellulose, chitin oligosaccharide synthase
Cphy3103	ABX43459.1	969	322	37455.3	None	GT2	Cellulose, chitin oligosaccharide synthase
Cphy3109	ABX43465.1	1887	628	71682.4	None	GH25	lysozyme
Cphy3158	ABX43513.1	2055	684	78505.3	None	GH67	Alpha-glucuronidase
Cphy3160	ABX43515.1	3558	1185	135407	None	GH2	Beta-galactosidase, beta-mannosidase
Cphy3202	ABX43556.1	2232	743	81984.1	32	GH5,CBM46,CBM2	cellulase
Cphy3207	ABX43561.1	1146	381	44046	None	GH8	reducing-end-xylose releasing exo-oligoxylanase
Cphy3217	ABX43571.1	1476	491	54736.4	None	GH28	polygalacturonase, rhamnogalacturonase
Cphy3239	ABX43593.1	1908	635	73568.6	None	GH20	beta-1,6-N-acetylglucosaminidase
Cphy3309	ABX43663.1	627	208	23445.1	None	CBM32	coagulation factor 5/8 type domain-containing protein
Cphy3310	ABX43664.1	1557	518	57957	None	GH28	polygalacturonase, rhamnogalacturonase
Cphy3313	ABX43667.1	2247	748	85123.2	None	GH65	Phosphorylase: kojibiose , rhamnose, nigerose, maltose
Cphy3314	ABX43668.1	2418	805	92926.7	None	GH65	Phosphorylase: kojibiose , rhamnose, nigerose, maltose
Cphy3329	ABX43682.1	2919	972	110049	None	GH3	Beta-glucosidase, beta-xylosidase, alpha-arabinofuranosidase
Cphy3367	ABX43720.1	2958	985	107371	25	GH9,CBM3,CBM3	1,4-beta-cellobiosidase, cellulase
Cphy3368	ABX43721.1	2760	919	101815	28	GH48,CBM3	1,4-beta-cellobiosidase
Cphy3388	ABX43741.1	5085	1694	187383	35	GH16,CBM4,CBM4,CBM4,CBM4	endo-1,3-beta-D-glucosidase
Cphy3396	ABX43749.1	1401	466	52937.3	None	GH4	Alpha-glucosidase, alpha-galactosidase
Cphy3398	ABX43751.1	1545	514	58750.9	None	GH43	Beta-xylosidase, alpha-L-arabinofuranosidase, arabinanase
Cphy3404	ABX43757.1	1326	441	50650.1	None	GH30	Beta-glucosidase, beta-xylosidase, beta-fucosidase
Cphy3466	ABX43817.1	3846	1281	139385	None	GH73	peptidoglycan hydrolase, SH3 type 3 domain
Cphy3500	ABX43849.1	1020	339	40358	None	GTnc	hemolytic protein HlpA-like protein
Cphy3501	ABX43850.1	1257	418	48243.9	None	GT4	sucrose synthase
Cphy3505	ABX43854.1	1212	403	45966.8	None	GT4	sucrose synthase
Cphy3545	ABX43894.1	1176	391	45132.9	None	GT4	sucrose synthase
Cphy3571	ABX43920.1	1896	631	73651.3	None	GH20	beta-1,6-N-acetylglucosaminidase
Cphy3581	ABX43930.1	1134	377	41738	None	CE9	N-acetylglucosamine-6-phosphate deacetylase
Cphy3586	ABX43935.1	1545	514	57033	31	GH53,CBM13	endo-1,4-beta-galactosidase
Cphy3618	ABX43965.1	1527	508	58699.9	None	GH43	Beta-xylosidase, alpha-L-arabinofuranosidase, arabinanase
Cphy3721	ABX44068.1	1017	338	38989.7	None	GT2	Cellulose, chitin oligosaccharide synthase
Cphy3727	ABX44074.1	1068	355	38920.8	None	GT28	UDP-N-acetylglucosamine--N-acetylmuramyl-(pentapeptide) pyrophosphoryl-undecaprenol N-acetylglucosamine transferase
Cphy3749	ABX44096.1	1704	567	64272.4	None	GH18	Chitinase, lysozyme
Cphy3785	ABX44132.1	2079	692	80219.8	None	GH31	Alpha-xylosidase, alpha-glucosidase
Cphy3854	ABX44201.1	2394	797	91052.9	None	GH94	cellobiose phosphorylase
Cphy3862	ABX44209.1	7374	2457	266636	34	GH10,GH10,CE15	endo-1,4-beta-xylanase, 4-O-methyl-glucuronoyl methylesterase
Cphy3869	ABX44216.1	4296	1431	154413	35	PL9	pectate lyase, fibronectin type III domain

## Sheet: GH
Gene	Accession	Gene_length_bp	Protein_length_aa	Mol_weight_kDa	Signal_cleavage_position_aa	CAZy	Annotation
Cphy0191	ABX40578.1	1539	512	58507.2	None	GH43	Beta-xylosidase, alpha-L-arabinofuranosidase, arabinanase
Cphy0203	ABX40590.1	1128	375	44333	None	GH105	rhamnogalacturonyl hydrolase
Cphy0218	ABX40605.1	2343	780	88273	None	GH31	Alpha-xylosidase, alpha-glucosidase
Cphy0220	ABX40607.1	2166	721	81176.4	None	GH3	Beta-glucosidase, beta-xylosidase, alpha-arabinofuranosidase
Cphy0288	ABX40675.1	1155	384	43924.7	None	GH88	beta-glucuronyl hydrolase
Cphy0430	ABX40817.1	2496	831	94482.1	None	GH94	cellobiose phosphorylase
Cphy0530	ABX40917.1	1776	591	69166.4	None	GH2	Beta-galactosidase, beta-mannosidase
Cphy0531	ABX40918.1	1416	471	52751.7	None	GH43	Beta-xylosidase, alpha-L-arabinofuranosidase, arabinanase
Cphy0577	ABX40964.1	2172	723	83906.1	None	GH112	1,3-galactosyl-N-acetylhexosamine phosphorylase
Cphy0591	ABX40978.1	1941	646	74349.2	None	GH127	beta-L-arabinofuranosidase
Cphy0607	ABX40994.1	1821	606	70078.9	None	GH20	beta-1,6-N-acetylglucosaminidase
Cphy0624	ABX41011.1	2271	756	83730.6	30	CBM22,GH10,CBM3	endo-1,4-beta-xylanase
Cphy0662	ABX41049.1	2244	747	82793.7	None	GH3	Beta-glucosidase, beta-xylosidase, alpha-arabinofuranosidase
Cphy0666	ABX41053.1	2694	897	102695	None	GHnc	hypothetical protein
Cphy0694	ABX41081.1	3342	1113	126352	None	GH94	cellobiose phosphorylase
Cphy0699	ABX41086.1	2232	743	82937.9	None	GH3	Beta-glucosidase, beta-xylosidase, alpha-arabinofuranosidase
Cphy0711	ABX41098.1	1881	626	72885.2	None	GH2	Beta-galactosidase, beta-mannosidase
Cphy0769	ABX41156.1	1323	440	49055.1	None	GH4	Alpha-glucosidase, alpha-galactosidase
Cphy0776	ABX41163.1	1095	364	41655.2	None	GH88	beta-glucuronyl hydrolase
Cphy0777	ABX41164.1	948	315	36531	None	GHnc	hypothetical protein
Cphy0857	ABX41243.1	2703	900	103038	None	GH94	cellobiose phosphorylase
Cphy0858	ABX41244.1	1338	445	51308.2	None	GH30	Beta-glucosidase, beta-xylosidase, beta-fucosidase
Cphy0874	ABX41260.1	2283	760	86794	None	GH95	alpha-1,2-L-fucosidase
Cphy0875	ABX41261.1	1911	636	72678	None	GH43	Beta-xylosidase, alpha-L-arabinofuranosidase, arabinanase
Cphy0886	ABX41272.1	969	322	38386.7	None	GH113	beta-mannanase
Cphy0934	ABX41318.1	1176	391	44812.7	None	GH88	beta-glucuronyl hydrolase
Cphy1019	ABX41399.1	2271	756	88004.7	None	GH65	Phosphorylase: kojibiose , rhamnose, nigerose, maltose
Cphy1071	ABX41451.1	2187	728	80272.5	45	CBM35,GH26,CBM3	endo-1,4-beta-mannosidase
Cphy1125	ABX41503.1	1554	517	57157.8	None	GH3	Beta-glucosidase, beta-xylosidase, alpha-arabinofuranosidase
Cphy1163	ABX41541.1	1407	468	53330.6	32	GH5	cellulase
Cphy1169	ABX41547.1	1500	499	56545.4	None	GH51	Alpha-N-arabinofuranosidase
Cphy1308	ABX41685.1	3258	1085	116744	29	GH87	alpha-1,3-glucanase
Cphy1395	ABX41770.1	2277	758	86778.1	None	GH95	alpha-1,2-L-fucosidase
Cphy1435	ABX41810.1	1092	363	38795.4	None	GH19	chitinase, lysozyme, peptidoglycan binding domain
Cphy1510	ABX41884.1	1563	520	56975.2	34	GH10	endo-1,4-beta-xylanase
Cphy1596	ABX41970.1	2559	852	93573.6	None	GH3	Beta-glucosidase, beta-xylosidase, alpha-arabinofuranosidase
Cphy1640	ABX42012.1	726	241	26288.2	28	GH12	xyloglucan endoglucanase
Cphy1652	ABX42024.1	1272	423	48093.7	None	CBM50,CBM50,GH18	Chitinase, lysozyme, peptidoglycan-binding LysM
Cphy1711	ABX42083.1	1863	620	70624.7	None	GH28	polygalacturonase, rhamnogalacturonase
Cphy1714	ABX42086.1	2856	951	105915	26	GH85,CBM32	Endo-b-N-acetylglucosaminidase
Cphy1718	ABX42090.1	957	318	36788.7	None	GH130	beta-1,4-mannooligosaccharide phosphorylase
Cphy1719	ABX42091.1	1284	427	48915.1	None	GH125	Exo-alpha-1,6-mannosidase
Cphy1720	ABX42092.1	3132	1043	122067	None	GH38	alpha-mannosidase
Cphy1750	ABX42122.1	960	319	36185.8	None	GH105	rhamnogalacturonyl hydrolase
Cphy1775	ABX42145.1	6354	2117	225983	32	CBM54,GH55,CBM32,CBM32	beta-1,3-glucanase, S-layer domain
Cphy1799	ABX42168.1	1656	551	57741.7	32	CBM12,GH18	Exo-chitinase
Cphy1800	ABX42169.1	1959	652	70944.9	31	GH18,CBM12	Endo-chitinase
Cphy1873	ABX42242.1	3276	1091	118229	30	CBM35,CBM6,GH87	alpha-1,3-glucanase
Cphy1874	ABX42243.1	2262	753	87183.9	None	GH65	Phosphorylase: kojibiose , rhamnose, nigerose, maltose
Cphy1877	ABX42246.1	2394	797	92799.2	None	GH31	Alpha-xylosidase, alpha-glucosidase
Cphy1882	ABX42251.1	4233	1410	159485	29	GH87	alpha-1,3-glucanase
Cphy1919	ABX42288.1	1038	345	40014.5	None	GH105	rhamnogalacturonyl hydrolase
Cphy1920	ABX42289.1	2169	722	83256.5	None	GH112	1,3-galactosyl-N-acetylhexosamine phosphorylase
Cphy1929	ABX42297.1	2394	797	89977.5	None	GH94	cellobiose phosphorylase
Cphy1934	ABX42302.1	1932	643	74536.3	None	GH13	alpha amylase
Cphy1936	ABX42304.1	2457	818	94345.1	None	GH36	alpha-galactosidase
Cphy1937	ABX42305.1	1284	427	49559.7	None	GH1	Beta-glucosidase, beta-galactosidase
Cphy1943	ABX42311.1	1395	464	52142	27	CBM5,GH19	chitinase
Cphy2025	ABX42393.1	1923	640	74380.4	None	GH2	Beta-galactosidase, beta-mannosidase
Cphy2028	ABX42396.1	1497	498	56456.2	None	GH43	Beta-xylosidase, alpha-L-arabinofuranosidase, arabinanase
Cphy2058	ABX42426.1	1410	469	53051.6	36	GH5	cellulase
Cphy2105	ABX42471.1	639	212	22916.2	30	GH11	endo-1,4-beta-xylanase
Cphy2108	ABX42474.1	2421	806	89454.2	31	CBM22,GH10	endo-1,4-beta-xylanase
Cphy2128	ABX42494.1	2574	857	95393	29	CBM35,GH26,CBM3	endo-1,4-beta-mannosidase
Cphy2190	ABX42556.1	1308	435	50410	None	GH29	Alpha-L-fucosidase
Cphy2210	ABX42576.1	1074	357	41233.6	24	GH18	Chitinase, lysozyme
Cphy2264	ABX42627.1	1023	340	38331.4	None	GH130	beta-1,4-mannooligosaccharide phosphorylase
Cphy2276	ABX42637.1	1599	532	60015.8	29	CBM35,GH26	endo-1,4-beta-mannosidase
Cphy2304	ABX42665.1	3132	1043	117121	28	CBM41,CBM48,GH13	Alpha-amylase
Cphy2331	ABX42692.1	1944	647	72990.4	None	CBM48,GH13	Alpha-amylase
Cphy2332	ABX42693.1	1230	409	45390.2	29	GH3	Beta-glucosidase, beta-xylosidase, alpha-arabinofuranosidase
Cphy2341	ABX42702.1	1665	554	64671.8	None	GH13	alpha amylase
Cphy2342	ABX42703.1	1617	538	62962.3	None	GH13	alpha amylase
Cphy2344	ABX42705.1	1728	575	65389.3	25	GH13	alpha amylase
Cphy2349	ABX42710.1	1452	483	56827.8	None	GH77	amylomaltase or 4-a-glucanotransferase
Cphy2350	ABX42711.1	1752	583	69012.6	None	GH13	alpha amylase
Cphy2567	ABX42928.1	1425	474	52839.5	None	GH28	polygalacturonase, rhamnogalacturonase
Cphy2572	ABX42933.1	1068	355	40303.8	None	GH18	Chitinase, lysozyme
Cphy2632	ABX42993.1	1632	543	61453	None	GH43	Beta-xylosidase, alpha-L-arabinofuranosidase, arabinanase
Cphy2736	ABX43097.1	1557	518	58234.2	None	GH28	polygalacturonase, rhamnogalacturonase
Cphy2737	ABX43098.1	885	294	34422.6	None	GH105	rhamnogalacturonyl hydrolase
Cphy2848	ABX43208.1	1464	487	55075	None	GH4	Alpha-glucosidase, alpha-galactosidase
Cphy3009	ABX43366.1	2154	717	79867.2	None	GH3	Beta-glucosidase, beta-xylosidase, alpha-arabinofuranosidase
Cphy3010	ABX43367.1	966	321	38057.9	None	GH10	endo-1,4-beta-xylanase
Cphy3011	ABX43368.1	1617	538	61056.7	None	GH43	Beta-xylosidase, alpha-L-arabinofuranosidase, arabinanase
Cphy3023	ABX43380.1	1308	435	49919.4	None	GH29	Alpha-L-fucosidase
Cphy3028	ABX43385.1	1413	470	53713.3	None	GH29	Alpha-L-fucosidase
Cphy3029	ABX43386.1	1176	391	44965.2	None	GH88	beta-glucuronyl hydrolase
Cphy3030	ABX43387.1	2175	724	83867.2	None	GH112	1,3-galactosyl-N-acetylhexosamine phosphorylase
Cphy3056	ABX43413.1	2190	729	83563.2	None	GH36	alpha-galactosidase
Cphy3081	ABX43438.1	3450	1149	132714	None	GH2	Beta-galactosidase, beta-mannosidase
Cphy3109	ABX43465.1	1887	628	71682.4	None	GH25	lysozyme
Cphy3158	ABX43513.1	2055	684	78505.3	None	GH67	Alpha-glucuronidase
Cphy3160	ABX43515.1	3558	1185	135407	None	GH2	Beta-galactosidase, beta-mannosidase
Cphy3202	ABX43556.1	2232	743	81984.1	32	GH5,CBM46,CBM2	cellulase
Cphy3207	ABX43561.1	1146	381	44046	None	GH8	reducing-end-xylose releasing exo-oligoxylanase
Cphy3217	ABX43571.1	1476	491	54736.4	None	GH28	polygalacturonase, rhamnogalacturonase
Cphy3239	ABX43593.1	1908	635	73568.6	None	GH20	beta-1,6-N-acetylglucosaminidase
Cphy3310	ABX43664.1	1557	518	57957	None	GH28	polygalacturonase, rhamnogalacturonase
Cphy3313	ABX43667.1	2247	748	85123.2	None	GH65	Phosphorylase: kojibiose , rhamnose, nigerose, maltose
Cphy3314	ABX43668.1	2418	805	92926.7	None	GH65	Phosphorylase: kojibiose , rhamnose, nigerose, maltose
Cphy3329	ABX43682.1	2919	972	110049	None	GH3	Beta-glucosidase, beta-xylosidase, alpha-arabinofuranosidase
Cphy3367	ABX43720.1	2958	985	107371	25	GH9,CBM3,CBM3	1,4-beta-cellobiosidase, cellulase
Cphy3368	ABX43721.1	2760	919	101815	28	GH48,CBM3	1,4-beta-cellobiosidase
Cphy3388	ABX43741.1	5085	1694	187383	35	GH16,CBM4,CBM4,CBM4,CBM4	endo-1,3-beta-D-glucosidase
Cphy3396	ABX43749.1	1401	466	52937.3	None	GH4	Alpha-glucosidase, alpha-galactosidase
Cphy3398	ABX43751.1	1545	514	58750.9	None	GH43	Beta-xylosidase, alpha-L-arabinofuranosidase, arabinanase
Cphy3404	ABX43757.1	1326	441	50650.1	None	GH30	Beta-glucosidase, beta-xylosidase, beta-fucosidase
Cphy3466	ABX43817.1	3846	1281	139385	None	GH73	peptidoglycan hydrolase, SH3 type 3 domain
Cphy3571	ABX43920.1	1896	631	73651.3	None	GH20	beta-1,6-N-acetylglucosaminidase
Cphy3586	ABX43935.1	1545	514	57033	31	GH53,CBM13	endo-1,4-beta-galactosidase
Cphy3618	ABX43965.1	1527	508	58699.9	None	GH43	Beta-xylosidase, alpha-L-arabinofuranosidase, arabinanase
Cphy3749	ABX44096.1	1704	567	64272.4	None	GH18	Chitinase, lysozyme
Cphy3785	ABX44132.1	2079	692	80219.8	None	GH31	Alpha-xylosidase, alpha-glucosidase
Cphy3854	ABX44201.1	2394	797	91052.9	None	GH94	cellobiose phosphorylase
Cphy3862	ABX44209.1	7374	2457	266636	34	GH10,GH10,CE15	endo-1,4-beta-xylanase, 4-O-methyl-glucuronoyl methylesterase

## Sheet: PL
Gene	Accession	Gene_length_bp	Protein_length_aa	Mol_weight_kDa	Signal_cleavage_position_aa	CAZy	Annotation
Cphy0343	ABX40730.1	2412	803	91051	None	PL11	rhamnogalacturonan lyase, FG-GAP repeat
Cphy0488	ABX40875.1	2286	761	88748.3	None	PL15	alginate lyase
Cphy0489	ABX40876.1	1869	622	72048.5	None	PL17	alginate lyase
Cphy0492	ABX40879.1	4671	1556	171217	32	CBM50,CBM50,PL7	alginate lyase
Cphy1612	ABX41986.1	4230	1409	153290	35	PL1,PL9	Pectate lyase, Pectin lyase
Cphy1888	ABX42257.1	1851	616	65449	35	PL9	pectate lyase
Cphy2919	ABX43277.1	1017	338	36080.3	30	PL9	pectate lyase
Cphy3022	ABX43379.1	1974	657	75761.7	None	PL12	heparinase II/III family protein
Cphy3869	ABX44216.1	4296	1431	154413	35	PL9	pectate lyase, fibronectin type III domain

## Sheet: CE
Gene	Accession	Gene_length_bp	Protein_length_aa	Mol_weight_kDa	Signal_cleavage_position_aa	CAZy	Annotation
Cphy0110	ABX40499.1	1035	344	37778.2	None	CE4	acetyl xylan esterase, chitin deacetylase
Cphy0405	ABX40792.1	705	234	27592.7	None	CE4	acetyl xylan esterase, chitin deacetylase
Cphy0538	ABX40925.1	972	323	37054.5	None	CE4	acetyl xylan esterase, chitin deacetylase
Cphy0601	ABX40988.1	780	259	29316.6	None	CE4	acetyl xylan esterase, chitin deacetylase
Cphy1140	ABX41518.1	1158	385	44251.4	None	CE2	acetyl xylan esterase
Cphy1254	ABX41632.1	1074	357	40521	None	CE2	acetyl xylan esterase
Cphy1301	ABX41678.1	1038	345	38926.8	None	CE8	pectinesterase
Cphy1687	ABX42059.1	1011	336	36252.1	27	CBM36,CE4	acetyl xylan esterase, chitin deacetylase
Cphy1847	ABX42216.1	861	286	32800.2	None	CE4	acetyl xylan esterase, chitin deacetylase
Cphy2730	ABX43091.1	825	274	32093.1	None	CE4	acetyl xylan esterase, chitin deacetylase
Cphy2735	ABX43096.1	720	239	27322.7	None	CE12	acetyl xylan esterase
Cphy3069	ABX43426.1	1398	465	53259.9	None	CE4	acetyl xylan esterase, chitin deacetylase
Cphy3581	ABX43930.1	1134	377	41738	None	CE9	N-acetylglucosamine-6-phosphate deacetylase

## Sheet: GT
Gene	Accession	Gene_length_bp	Protein_length_aa	Mol_weight_kDa	Signal_cleavage_position_aa	CAZy	Annotation
Cphy0297	ABX40684.1	2913	970	114643	None	GT2	chitin oligosaccharide synthase
Cphy0299	ABX40686.1	1029	342	38918.9	None	GT2	Cellulose, chitin oligosaccharide synthase
Cphy0323	ABX40710.1	1026	341	40119.8	None	GT2	Cellulose, chitin oligosaccharide synthase
Cphy0497	ABX40884.1	2724	907	101189	None	GT51	glycosyl transferase family protein
Cphy0498	ABX40885.1	2733	910	101238	None	GT51	glycosyl transferase family protein
Cphy1202	ABX41580.1	519	172	20538.9	None	GT1	oligosaccharide biosynthesis protein Alg14-like protein
Cphy1203	ABX41581.1	510	169	19501.7	None	GT1	glycosyltransferase family 28 protein
Cphy1204	ABX41582.1	1230	409	47184.2	None	GT4	sucrose synthase
Cphy1206	ABX41584.1	1074	357	41001.3	None	GT4	sucrose synthase
Cphy1614	ABX41988.1	627	208	24017.6	None	GT51	glycosyl transferase family protein
Cphy1645	ABX42017.1	1251	416	48829.6	None	GT2	Cellulose, chitin oligosaccharide synthase
Cphy1695	ABX42067.1	1083	360	42638.9	None	GT2	Cellulose, chitin oligosaccharide synthase
Cphy1892	ABX42261.1	1176	391	44605.9	None	GT28	monogalactosyldiacylglycerol synthase
Cphy2212	ABX42578.1	1947	648	75148.8	None	GT2	Cellulose, chitin oligosaccharide synthase
Cphy2336	ABX42697.1	2421	806	94445	None	GT4	sucrose synthase
Cphy2348	ABX42709.1	2250	749	86851	None	GT35	glycogen/starch/alpha-glucan phosphorylase
Cphy2496	ABX42857.1	1437	478	55868.7	None	GT5	glycogen/starch synthase, ADP-glucose type
Cphy2807	ABX43167.1	1260	419	48163.8	None	GT2	Cellulose, chitin oligosaccharide synthase
Cphy2810	ABX43170.1	1071	356	41769.8	None	GT2	Cellulose, chitin oligosaccharide synthase
Cphy2811	ABX43171.1	2565	854	96657.9	None	GT4,GT4	sucrose synthase
Cphy2813	ABX43173.1	975	324	36519.4	None	GT4	sucrose synthase
Cphy2814	ABX43174.1	1374	457	52270	None	GT2	Cellulose, chitin oligosaccharide synthase
Cphy2887	ABX43245.1	744	247	28530.1	None	GT2	Cellulose, chitin oligosaccharide synthase
Cphy3102	ABX43458.1	939	312	36918.2	None	GT2	Cellulose, chitin oligosaccharide synthase
Cphy3103	ABX43459.1	969	322	37455.3	None	GT2	Cellulose, chitin oligosaccharide synthase
Cphy3500	ABX43849.1	1020	339	40358	None	GTnc	hemolytic protein HlpA-like protein
Cphy3501	ABX43850.1	1257	418	48243.9	None	GT4	sucrose synthase
Cphy3505	ABX43854.1	1212	403	45966.8	None	GT4	sucrose synthase
Cphy3545	ABX43894.1	1176	391	45132.9	None	GT4	sucrose synthase
Cphy3721	ABX44068.1	1017	338	38989.7	None	GT2	Cellulose, chitin oligosaccharide synthase
Cphy3727	ABX44074.1	1068	355	38920.8	None	GT28	UDP-N-acetylglucosamine--N-acetylmuramyl-(pentapeptide) pyrophosphoryl-undecaprenol N-acetylglucosamine transferase

## Sheet: CBM
Gene	Accession	Gene_length_bp	Protein_length_aa	Mol_weight_kDa	Signal_cleavage_position_aa	CAZy	Annotation
Cphy0492	ABX40879.1	4671	1556	171217	32	CBM50,CBM50,PL7	alginate lyase
Cphy0624	ABX41011.1	2271	756	83730.6	30	CBM22,GH10,CBM3	endo-1,4-beta-xylanase
Cphy1071	ABX41451.1	2187	728	80272.5	45	CBM35,GH26,CBM3	endo-1,4-beta-mannosidase
Cphy1652	ABX42024.1	1272	423	48093.7	None	CBM50,CBM50,GH18	Chitinase, lysozyme, peptidoglycan-binding LysM
Cphy1687	ABX42059.1	1011	336	36252.1	27	CBM36,CE4	acetyl xylan esterase, chitin deacetylase
Cphy1713	ABX42085.1	1365	454	49120.8	36	CBM32	coagulation factor 5/8 type domain-containing protein
Cphy1714	ABX42086.1	2856	951	105915	26	GH85,CBM32	Endo-b-N-acetylglucosaminidase
Cphy1775	ABX42145.1	6354	2117	225983	32	CBM54,GH55,CBM32,CBM32	beta-1,3-glucanase, S-layer domain
Cphy1799	ABX42168.1	1656	551	57741.7	32	CBM12,GH18	Exo-chitinase
Cphy1800	ABX42169.1	1959	652	70944.9	31	GH18,CBM12	Endo-chitinase
Cphy1873	ABX42242.1	3276	1091	118229	30	CBM35,CBM6,GH87	alpha-1,3-glucanase
Cphy1943	ABX42311.1	1395	464	52142	27	CBM5,GH19	chitinase
Cphy2108	ABX42474.1	2421	806	89454.2	31	CBM22,GH10	endo-1,4-beta-xylanase
Cphy2128	ABX42494.1	2574	857	95393	29	CBM35,GH26,CBM3	endo-1,4-beta-mannosidase
Cphy2276	ABX42637.1	1599	532	60015.8	29	CBM35,GH26	endo-1,4-beta-mannosidase
Cphy2304	ABX42665.1	3132	1043	117121	28	CBM41,CBM48,GH13	Alpha-amylase
Cphy2331	ABX42692.1	1944	647	72990.4	None	CBM48,GH13	Alpha-amylase
Cphy3202	ABX43556.1	2232	743	81984.1	32	GH5,CBM46,CBM2	cellulase
Cphy3309	ABX43663.1	627	208	23445.1	None	CBM32	coagulation factor 5/8 type domain-containing protein
Cphy3367	ABX43720.1	2958	985	107371	25	GH9,CBM3,CBM3	1,4-beta-cellobiosidase, cellulase
Cphy3368	ABX43721.1	2760	919	101815	28	GH48,CBM3	1,4-beta-cellobiosidase
Cphy3388	ABX43741.1	5085	1694	187383	35	GH16,CBM4,CBM4,CBM4,CBM4	endo-1,3-beta-D-glucosidase
Cphy3586	ABX43935.1	1545	514	57033	31	GH53,CBM13	endo-1,4-beta-galactosidase
