# Supplementary material for: Functional Diversity of Carbohydrate-Active Enzymes Enabling a Bacterium to Ferment Plant Biomass
Source: PLoS Genet. 2014 Nov 13;10(11):e1004773. doi: 10.1371/journal.pgen.1004773 (PMC4230839; doi:10.1371/journal.pgen.1004773)
Supplement: Table S3 — Vendor product information for mono-, di-, and polysaccharides used in this study. (XLS) [file pgen.1004773.s015.xls]

## Sheet: Sheet1
Oligo-/Polysaccharide	Vendor	Product Number	Plant Source Used in this Study	Notes
Homogalacturonan	Sigma	P8471	apple pectin (75% methylesterified)
Debranched arabinan	Megazyme	P-DBAR	sugar beet
Arabinogalactan	Megazyme	P-ARGAL	larch
Rhamnogalacturonan	Megazyme	P-RHAM1	potato fiber
Galactan	Megazyme	P-GALLU	lupin
Xyloglucan (high viscosity)	Megazyme	P-XYGLN	tamarind
Xylan	Sigma	X0502	birchwood
Arabinoxylan (low viscosity)	Megazyme	P-WAXYL	wheat	avg MW 66,000, treated with alkali to remove ferulic acid and acetyl groups
Beta-mannan	Megazyme	P-MANIV	ivory nut
Galactomannan	Sigma	G0753	carob (Ceratonia siliqua), locust bean gum
Glucomannan	Megazyme	P-GLCML	konjac
Starch	Sigma	S4126	corn
Filter paper cellulose	Whatman	1001‐090	not available	0.5 × 5 cm strips of #1 filter paper used for RNA-seq samples
Regenerated cellulose, prepared from Avicel PH-101	Sigma	11365	not available	regenerated cellulose was used for GS2 plate assays and enzyme activities
Carboxymethylcellulose	Sigma	C4888	not available
D-(+)-Cellobiose	Sigma	C7252	not available
Raw corn stover	N/A	N/A	corn	Corn stover was provided by Qteros Inc and was cut into 0.5 x 5 cm strips for cultures sampled for RNA-seq
Monosaccharide	Vendor	Product Number
D-(+)-Glucose	Sigma	G5767
D-(−)-Arabinose	Sigma	A3131
D-(+)-Galactose	Sigma	G0750
D-(+)-Mannose	Sigma	M4625
D-Galacturonic acid sodium salt	Sigma	73960
D-(+)-Xylose	Sigma	X3877
L-Rhamnose monohydrate	Sigma	R3875
