# Supplementary material for: Functional Diversity of Carbohydrate-Active Enzymes Enabling a Bacterium to Ferment Plant Biomass
Source: PLoS Genet. 2014 Nov 13;10(11):e1004773. doi: 10.1371/journal.pgen.1004773 (PMC4230839; doi:10.1371/journal.pgen.1004773)
Supplement: Table S4 — C. phytofermentans growth rates (generation time in hours) and cell yields (maximum OD600) growing on polysaccharides and di-/monosaccharides. Growth rate on each substrate was calculated by log-transforming the mean growth curve (Fig. 1,S1) and calculating the slop of a linear regression fit to the portion of the curve describing exponential growth. Regressions were fit to each of the two growth phases on galactomannan and xyloglucan. (XLS) [file pgen.1004773.s016.xls]

## Sheet: Sheet1
POLYSACCHARIDES
		Cell Yield (max OD600)
Substrate	Generation time (hours)	Mean	Standard Deviation
homogalacturonan	0.700079	0.461333	0.0164124
rhamnogalacturonan I	4.65795	0.102167	0.00516398
galactan	4.39455	0.832167	0.0469116
arabinan	4.67181	0.149	0.00288097
arabinogalactan II	2.23887	0.0872667	0.0010328
xylan	1.7398	0.7559	0.0293513
arabinoxylan	2.28739	0.534667	0.0578461
glucomannan	3.88856	0.844167	0.0155563
galactomannan	2.61 ( growth phase 1), 23.21 (growth phase 2)	0.185833	0.0277176
xyloglucan	2.47 (growth phase 1), 31.88 (growth phase 2)	1.14413	0.0332692
carboxymethylcellulose	1.35164	0.073	0.00265832
starch	12.3865	0.649833	0.0231725
DI- and MONOSACCHARIDES
		Cell Yield (max OD600)
Substrate	Generation time (hours)	Mean	Standard Deviation
cellobiose	3.81231	0.7665	0.0566304
D-glucose	2.64089	0.80875	0.0193778
D-galactose	2.19728	0.754917	0.0620074
D-xylose	6.07197	0.557583	0.0271662
D-mannose	5.02532	0.134167	0.0326093
D-galacturonic acid	2.86963	0.448167	0.0109636
L-arabinose	7.72166	0.055	0.00296648
L-rhamnose	1.53879	0.165167	0.0315764
